# Supplementary figures and images for: Metabolic Effects of FecB Gene on Follicular Fluid and Ovarian Vein Serum in Sheep (Ovis aries)
Source: MDPI journal article supplement (doi:10.3390/ijms19020539), 2018-02-11

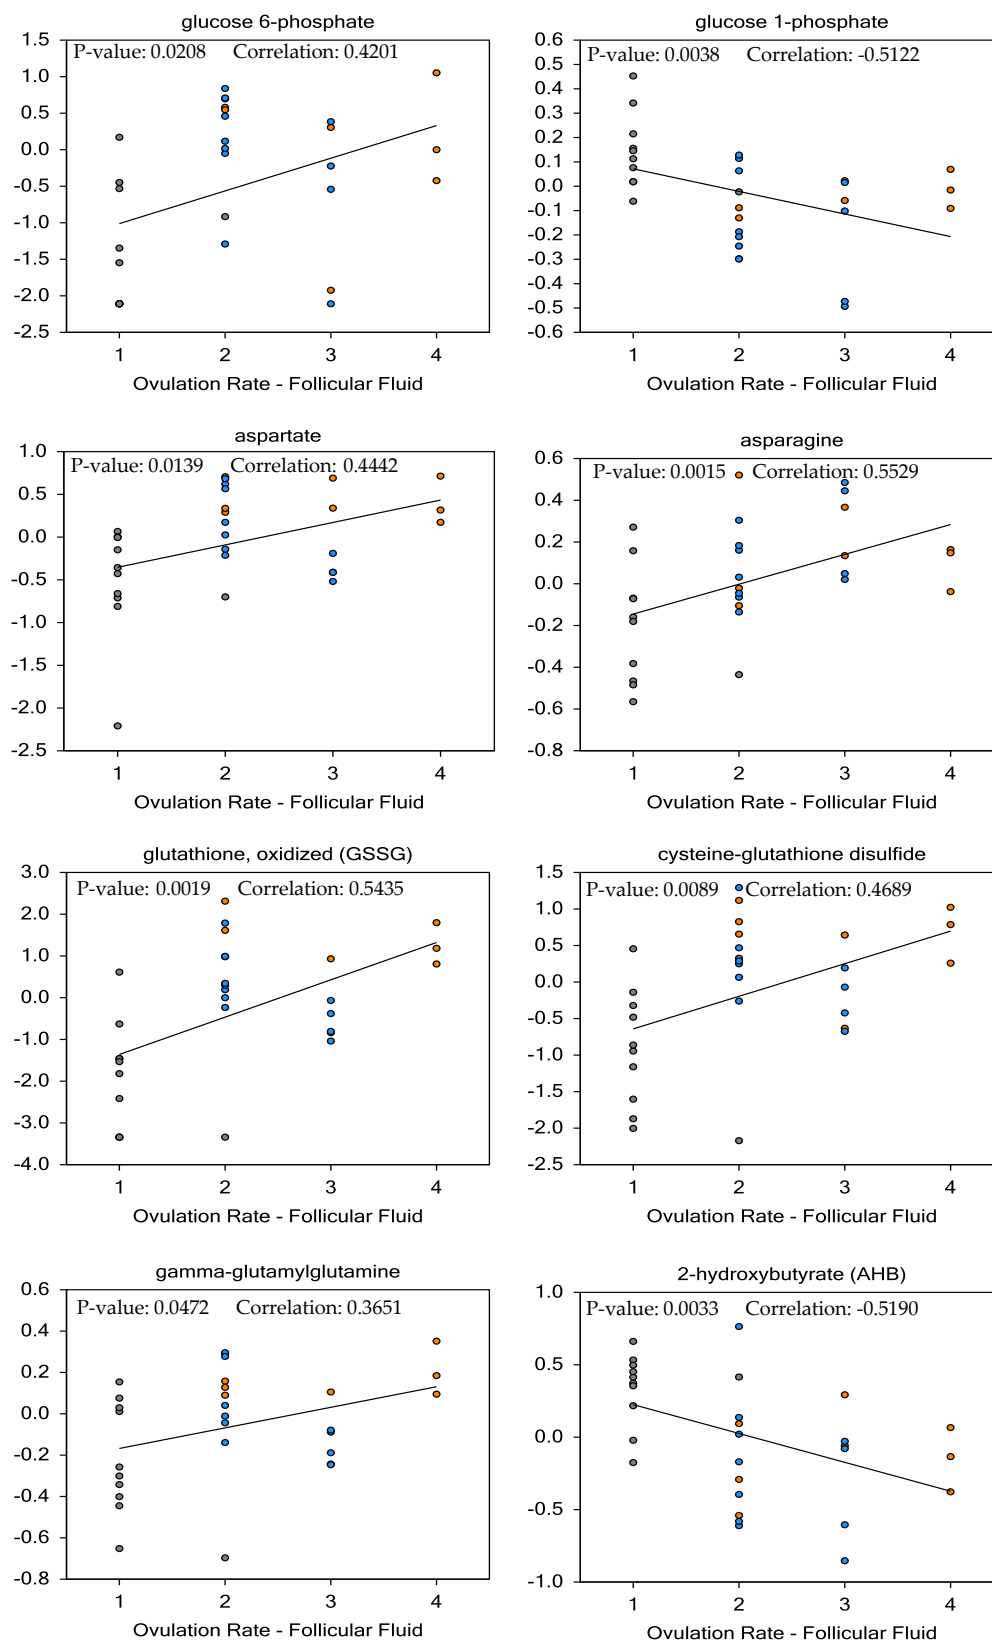

**Figure S1 Scatter plots for the correlation between ovulation rate and metabolite levels**

Supplement: s1 [file s1]
